# Supplementary material
Source: Springer Nature journal article supplement (https://www.springermedizin.de/resource/supplementary/13014_2013_809_MOESM1_ESM.pdf/9634778)

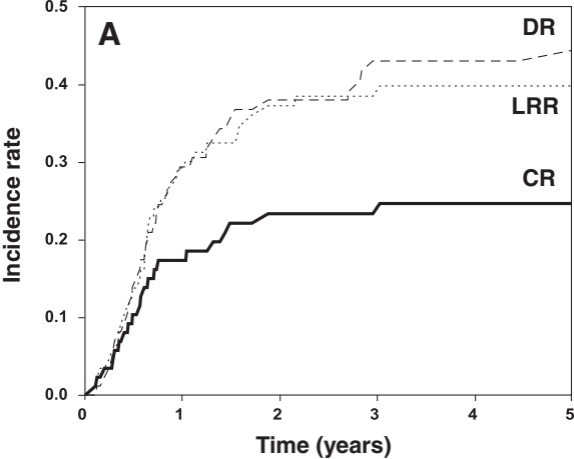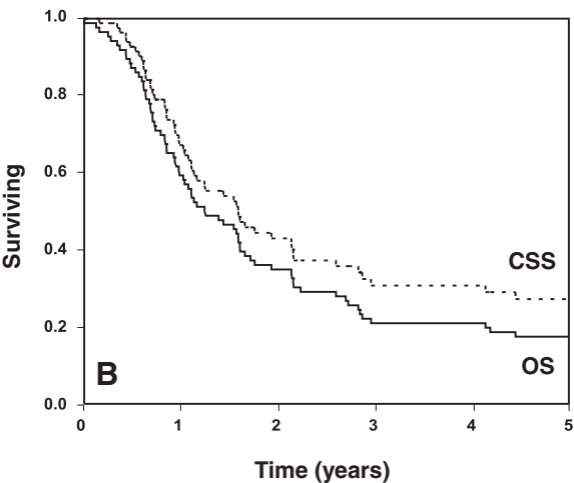

Supplement: MOESM1 [file 9634778]
